# Supplementary material
Source: PubMed Central journal article supplement (PMC2862422)
Supplement: pp.110.155226_2.pdf [file pp.110.155226_2.pdf]

|          |                                                                                                                                                                                                                                                                                                                                                                                                                                                                                                                                                                                                         |     |
|----------|---------------------------------------------------------------------------------------------------------------------------------------------------------------------------------------------------------------------------------------------------------------------------------------------------------------------------------------------------------------------------------------------------------------------------------------------------------------------------------------------------------------------------------------------------------------------------------------------------------|-----|
| ZmYUC    | MT-----EKVLV-----ITVAGP <small>S</small> GLAV <small>A</small> ACL <small>S</small> ENG <small>I</small> PYH <small>I</small> VER <small>S</small> DC <small>S</small> AS <small>L</small> W <small>K</small> RTY <small>D</small> RL <small>K</small> L <small>H</small> L <small>A</small> K <small>S</small> F                                                                                                                                                                                                                                                                                       | 59  |
| AtYUC    | MESH <small>P</small> HN <small>K</small> TI <small>T</small> Q <small>T</small> -Q <small>H</small> I <small>L</small> L-VG <small>P</small> TI <small>I</small> GAG <small>P</small> S <small>G</small> LAV <small>S</small> ACL <small>S</small> ENG <small>V</small> P <small>S</small> L <small>I</small> L <small>R</small> S <small>D</small> ST <small>A</small> S <small>L</small> W <small>K</small> SK <small>T</small> Y <small>D</small> RL <small>L</small> L <small>H</small> L <small>P</small> AK <small>S</small> F                                                                   | 73  |
| FLOOZY   | MSSC---KEEDT-QQK <small>N</small> L <small>W</small> AG <small>P</small> IT <small>I</small> GAG <small>P</small> S <small>G</small> LAV <small>S</small> ACL <small>S</small> ENG <small>V</small> P <small>S</small> L <small>I</small> L <small>R</small> S <small>D</small> CI <small>A</small> S <small>L</small> W <small>K</small> Q <small>K</small> TY <small>D</small> RL <small>L</small> L <small>H</small> L <small>P</small> K <small>S</small> F                                                                                                                                         | 71  |
| LeYUCCA  | MGCC---KEEPP---K <small>N</small> L <small>W</small> AG <small>P</small> ITVAGAP <small>S</small> GLAV <small>S</small> ACL <small>S</small> ENG <small>V</small> P <small>S</small> L <small>I</small> L <small>R</small> S <small>D</small> CI <small>A</small> S <small>L</small> W <small>K</small> Q <small>K</small> TY <small>D</small> RL <small>L</small> L <small>H</small> L <small>P</small> K <small>S</small> F                                                                                                                                                                           | 69  |
| OsYUCCA7 | MVLQ <small>S</small> SD <small>R</small> MD <small>S</small> L <small>F</small> SP <small>Q</small> T <small>S</small> W <small>S</small> GP <small>I</small> TVGAGP <small>S</small> GLAV <small>A</small> ACL <small>S</small> ENG <small>V</small> P <small>S</small> L <small>I</small> L <small>R</small> S <small>D</small> CI <small>A</small> S <small>L</small> W <small>K</small> Q <small>K</small> TY <small>D</small> RL <small>L</small> L <small>H</small> L <small>P</small> K <small>S</small> F                                                                                      | 75  |
|          |                                                                                                                                                                                                                                                                                                                                                                                                                                                                                                                                                                                                         |     |
| ZmYUC    | CE <small>L</small> F <small>R</small> M <small>S</small> H <small>F</small> SD <small>A</small> PK <small>Y</small> IT <small>R</small> E <small>Q</small> F <small>V</small> R <small>Y</small> W <small>D</small> D <small>Y</small> VER <small>S</small> NI <small>L</small> PR <small>Y</small> ST <small>S</small> W <small>S</small> CE <small>Y</small> D <small>E</small> AS <small>G</small> R <small>W</small> D <small>V</small> RA <small>R</small> D <small>L</small> AD <small>G</small> G <small>G</small> R <small>W</small> AE <small>Y</small> T <small>A</small> R <small>F</small> | 134 |
| AtYUC    | CR <small>L</small> EL <small>L</small> E <small>F</small> PE <small>Y</small> Y <small>P</small> K <small>Y</small> PK <small>S</small> KN <small>E</small> FL <small>A</small> Y <small>L</small> ES <small>Y</small> AS <small>H</small> E <small>S</small> I <small>A</small> PR <small>F</small> NR <small>N</small> W <small>N</small> A <small>A</small> Y <small>D</small> SS <small>G</small> F <small>W</small> AV <small>T</small> HD---N---TE <small>Y</small> L <small>S</small> K <small>N</small>                                                                                        | 141 |
| FLOOZY   | CO <small>L</small> EL <small>L</small> E <small>F</small> FP <small>D</small> IN <small>E</small> PK <small>Y</small> PT <small>K</small> Q <small>F</small> IS <small>Y</small> LES <small>Y</small> AS <small>H</small> E <small>S</small> I <small>N</small> PK <small>Y</small> K <small>O</small> AV <small>O</small> VA <small>E</small> FD <small>H</small> V <small>G</small> F <small>W</small> AV <small>T</small> DN-----FO <small>Y</small> F <small>S</small> K <small>N</small>                                                                                                          | 138 |
| LeYUCCA  | CO <small>L</small> EL <small>L</small> E <small>F</small> FP <small>E</small> IN <small>E</small> PK <small>Y</small> PT <small>K</small> Q <small>F</small> IS <small>Y</small> LES <small>Y</small> AS <small>H</small> E <small>S</small> I <small>T</small> PK <small>F</small> Q <small>S</small> W <small>K</small> VA <small>E</small> FD <small>G</small> V <small>G</small> F <small>W</small> AV <small>T</small> Q <small>L</small> -----FO <small>Y</small> L <small>S</small> K <small>N</small>                                                                                          | 136 |
| OsYUCCA7 | CE <small>L</small> F <small>R</small> M <small>S</small> FP <small>A</small> HY <small>S</small> Y <small>P</small> TR <small>R</small> Q <small>F</small> IS <small>Y</small> LE <small>D</small> Y <small>A</small> AS <small>S</small> I <small>N</small> EL <small>F</small> GH <small>T</small> V <small>L</small> S <small>A</small> Y <small>D</small> ET <small>S</small> EL <small>M</small> R <small>V</small> RA <small>S</small> S---SAG <small>S</small> ME <small>Y</small> IG <small>S</small> N                                                                                        | 147 |
|          |                                                                                                                                                                                                                                                                                                                                                                                                                                                                                                                                                                                                         |     |
| ZmYUC    | L <small>V</small> AT <small>G</small> EN <small>A</small> E <small>S</small> V <small>I</small> P <small>I</small> PI <small>G</small> LR <small>D</small> FP <small>A</small> GV <small>W</small> H <small>S</small> S <small>Y</small> K <small>S</small> KN <small>Y</small> AG <small>S</small> R <small>V</small> L <small>W</small> GG <small>N</small> S <small>G</small> ME <small>L</small> AY <small>D</small> L <small>A</small> Y <small>N</small> GV <small>E</small> TS <small>L</small> V <small>I</small> R <small>S</small> SV                                                        | 209 |
| AtYUC    | L <small>V</small> AT <small>G</small> EN <small>A</small> D <small>P</small> Y <small>I</small> PI <small>P</small> GR <small>K</small> SG <small>G</small> K <small>I</small> V <small>H</small> SS <small>Y</small> K <small>S</small> GE <small>F</small> PR <small>Q</small> V <small>L</small> W <small>W</small> GG <small>N</small> S <small>G</small> ME <small>L</small> SL <small>D</small> L <small>V</small> R <small>H</small> NA <small>S</small> PH <small>L</small> V <small>V</small> R <small>N</small> IV                                                                           | 216 |
| FLOOZY   | L <small>V</small> AT <small>G</small> EN <small>A</small> E <small>P</small> V <small>I</small> PI <small>G</small> DR <small>P</small> SG- <small>P</small> W <small>H</small> ES <small>L</small> Y <small>K</small> SG <small>E</small> FP <small>N</small> OR <small>V</small> L <small>V</small> GG <small>N</small> S <small>G</small> ME <small>V</small> SL <small>D</small> L <small>C</small> R <small>H</small> NA <small>S</small> PH <small>M</small> W <small>R</small> NS <small>V</small>                                                                                              | 212 |
| LeYUCCA  | L <small>V</small> AT <small>G</small> EN <small>A</small> E <small>P</small> V <small>I</small> PI <small>G</small> DR <small>P</small> SG- <small>R</small> W <small>H</small> ES <small>L</small> Y <small>K</small> SG <small>E</small> FP <small>N</small> OR <small>V</small> L <small>V</small> GG <small>N</small> S <small>G</small> ME <small>V</small> SL <small>D</small> L <small>C</small> R <small>H</small> NA <small>S</small> PH <small>M</small> V <small>V</small> R <small>S</small> SV                                                                                            | 210 |
| OsYUCCA7 | L <small>V</small> AT <small>G</small> EN <small>A</small> E <small>S</small> W <small>P</small> EL <small>P</small> G <small>I</small> DS <small>F</small> -GG <small>P</small> W <small>H</small> VA <small>D</small> Y <small>K</small> SG <small>E</small> AY <small>R</small> GR <small>S</small> R <small>V</small> L <small>W</small> GG <small>N</small> S <small>G</small> ME <small>V</small> SL <small>D</small> L <small>C</small> DE <small>A</small> RP <small>A</small> M <small>V</small> V <small>R</small> DA <small>V</small>                                                        | 221 |
|          |                                                                                                                                                                                                                                                                                                                                                                                                                                                                                                                                                                                                         |     |
| ZmYUC    | H <small>V</small> M <small>T</small> K <small>G</small> L <small>I</small> ---Y-LG <small>M</small> L <small>L</small> EM <small>L</small> E <small>V</small> KL <small>V</small> DS <small>I</small> IL <small>I</small> L <small>A</small> N <small>I</small> Q <small>F</small> GL <small>S</small> R <small>Y</small> GL <small>V</small> RF <small>D</small> AG <small>P</small> L <small>L</small> K <small>A</small> KT <small>G</small> R <small>S</small> R <small>V</small> L <small>D</small> VG <small>T</small> TQ                                                                        | 279 |
| AtYUC    | H <small>V</small> L <small>P</small> RE <small>L</small> LG <small>V</small> ST <small>F</small> SVG <small>M</small> L <small>L</small> KC-L <small>E</small> L <small>R</small> L <small>V</small> DR <small>K</small> L <small>L</small> L <small>W</small> AN <small>L</small> SE <small>G</small> NT <small>D</small> L <small>G</small> L <small>R</small> PK <small>T</small> G <small>P</small> LE <small>L</small> KN <small>V</small> T <small>G</small> R <small>S</small> P <small>V</small> L <small>D</small> VG <small>A</small> LS                                                     | 290 |
| FLOOZY   | H <small>L</small> L <small>P</small> RE <small>L</small> LG <small>I</small> ST <small>F</small> SI <small>M</small> ALL <small>K</small> C-L <small>E</small> L <small>R</small> L <small>V</small> DR <small>K</small> L <small>L</small> L <small>W</small> AN <small>L</small> IL <small>G</small> NT <small>D</small> K <small>L</small> G <small>L</small> R <small>P</small> K <small>T</small> G <small>F</small> EL <small>K</small> NA <small>T</small> G <small>K</small> TE <small>V</small> L <small>D</small> VG <small>A</small> LS                                                     | 286 |
| LeYUCCA  | H <small>L</small> L <small>P</small> RE <small>L</small> LG <small>I</small> ST <small>F</small> SI <small>M</small> ALL <small>K</small> C-L <small>E</small> L <small>R</small> L <small>V</small> DR <small>K</small> L <small>L</small> L <small>W</small> AN <small>L</small> IL <small>G</small> ST <small>D</small> K <small>L</small> G <small>L</small> R <small>P</small> K <small>T</small> G <small>P</small> LE <small>L</small> KN <small>A</small> T <small>G</small> K <small>T</small> E <small>V</small> L <small>D</small> VG <small>A</small> LS                                   | 284 |
| OsYUCCA7 | H <small>V</small> L <small>P</small> RE <small>L</small> LG <small>K</small> ST <small>F</small> SI <small>A</small> V <small>L</small> L <small>A</small> W-L <small>E</small> L <small>A</small> L <small>V</small> DR <small>K</small> L <small>L</small> L <small>W</small> AN <small>L</small> IL <small>G</small> N <small>L</small> AK <small>L</small> G <small>L</small> RR <small>P</small> AT <small>G</small> P <small>L</small> E <small>L</small> KN <small>I</small> T <small>G</small> TE <small>V</small> L <small>D</small> VG <small>A</small> LA                                   | 295 |
|          |                                                                                                                                                                                                                                                                                                                                                                                                                                                                                                                                                                                                         |     |
| ZmYUC    | L <small>I</small> R <small>S</small> GI <small>T</small> W <small>P</small> GV <small>A</small> R <small>F</small> GR <small>G</small> EN <small>L</small> AD <small>G</small> R <small>V</small> I <small>A</small> L <small>D</small> AV <small>L</small> AT <small>G</small> Y <small>S</small> N <small>V</small> P <small>Q</small> W <small>L</small> C-G <small>N</small> DF <small>P</small> K <small>D</small> G <small>P</small> K-T <small>P</small> FP <small>N</small> G---W <small>R</small>                                                                                             | 354 |
| AtYUC    | L <small>I</small> R <small>S</small> GI <small>T</small> Q <small>I</small> W <small>P</small> GV <small>A</small> R <small>F</small> GR <small>G</small> EN <small>L</small> AD <small>G</small> R <small>V</small> I <small>A</small> L <small>D</small> AV <small>L</small> AT <small>G</small> Y <small>S</small> N <small>V</small> P <small>Q</small> W <small>L</small> C-G <small>D</small> DF <small>P</small> T <small>D</small> D <small>G</small> M <small>P</small> K-T <small>P</small> FP <small>N</small> G---W <small>R</small>                                                       | 359 |
| FLOOZY   | Q <small>I</small> R <small>S</small> GI <small>T</small> Q <small>I</small> W <small>H</small> W <small>K</small> E <small>I</small> T <small>K</small> I <small>G</small> AK <small>F</small> VDGK <small>E</small> SE <small>F</small> DS <small>I</small> IL <small>A</small> T <small>G</small> Y <small>K</small> S <small>N</small> V <small>P</small> SW <small>L</small> A-G <small>T</small> E <small>F</small> FT <small>S</small> Q <small>G</small> M <small>P</small> K-T <small>P</small> FP <small>N</small> G---W <small>R</small>                                                     | 355 |
| LeYUCCA  | Q <small>I</small> R <small>S</small> GI <small>T</small> Q <small>I</small> W <small>P</small> GV <small>A</small> R <small>F</small> GR <small>G</small> EN <small>L</small> AD <small>G</small> R <small>V</small> I <small>A</small> L <small>D</small> AV <small>L</small> AT <small>G</small> Y <small>S</small> N <small>V</small> P <small>Q</small> W <small>L</small> C-G <small>S</small> DF <small>P</small> T <small>S</small> Q <small>G</small> M <small>P</small> K-T <small>P</small> FP <small>N</small> G---W <small>R</small>                                                       | 353 |
| OsYUCCA7 | R <small>I</small> R <small>S</small> GI <small>T</small> W <small>P</small> GV <small>A</small> R <small>F</small> GR <small>G</small> EN <small>L</small> AD <small>G</small> R <small>V</small> I <small>A</small> L <small>D</small> AV <small>L</small> AT <small>G</small> Y <small>S</small> N <small>V</small> P <small>Q</small> W <small>L</small> C-G <small>N</small> DF <small>P</small> K <small>D</small> G <small>P</small> K-T <small>P</small> FP <small>N</small> G---W <small>R</small>                                                                                             | 364 |
|          |                                                                                                                                                                                                                                                                                                                                                                                                                                                                                                                                                                                                         |     |
| ZmYUC    | GG <small>N</small> LY <small>G</small> V <small>G</small> L <small>G</small> MA <small>G</small> L <small>A</small> GIS <small>S</small> DA <small>V</small> SV <small>A</small> ND <small>I</small> KAA-----VDS <small>M</small> W <small>G</small> PP <small>A</small> P <small>W</small> F                                                                                                                                                                                                                                                                                                          | 398 |
| AtYUC    | GG <small>R</small> GL <small>Y</small> TV <small>G</small> F <small>T</small> RR <small>G</small> LL <small>G</small> T <small>A</small> SD <small>A</small> V <small>K</small> T <small>A</small> SE <small>I</small> GD <small>Q</small> W <small>E</small> DE <small>I</small> NG <small>S</small> TR <small>A</small> M-CSS <small>R</small> V <small>F</small> T <small>S</small> K <small>S</small>                                                                                                                                                                                              | 414 |
| FLOOZY   | GG <small>N</small> LY <small>T</small> V <small>G</small> F <small>T</small> RR <small>G</small> LL <small>G</small> T <small>A</small> SD <small>A</small> NI <small>A</small> R <small>D</small> I <small>S</small> EW <small>R</small> K-Y <small>R</small> G <small>F</small> Q <small>R</small> N <small>F</small> -CI <small>S</small> N <small>L</small> SD <small>S</small> Q <small>G</small> I <small>Q</small> F                                                                                                                                                                            | 412 |
| LeYUCCA  | GG <small>N</small> LY <small>T</small> V <small>G</small> F <small>T</small> RR <small>G</small> LL <small>G</small> T <small>A</small> SD <small>A</small> NI <small>A</small> R <small>D</small> I <small>S</small> EQ <small>W</small> RS-F <small>R</small> G <small>F</small> Q <small>R</small> N <small>F</small> -CI <small>T</small> R <small>N</small> L <small>S</small> D <small>N</small> Q <small>G</small> I <small>Q</small> F                                                                                                                                                         | 410 |
| OsYUCCA7 | GG <small>S</small> GL <small>Y</small> W <small>V</small> G <small>F</small> T <small>R</small> R <small>G</small> L <small>S</small> AS <small>A</small> D <small>A</small> M <small>R</small> AK <small>D</small> L <small>A</small> W <small>W</small> KE <small>A</small> TR <small>P</small> TR <small>S</small> T <small>A</small> CH <small>R</small> GI---S <small>V</small> IF                                                                                                                                                                                                                | 419 |

Supplemental Figure 2. Protein alignment of ZmYUC from maize with homologs from *Arabidopsis thaliana* (AtYUC), petunia (FLOOZY), tomato (LeYUCCA) and rice (OsYucca7).
