# Supplementary material
Source: PubMed Central journal article supplement (PMC2862422)
Supplement: pp.110.155226_3.pdf [file pp.110.155226_3.pdf]

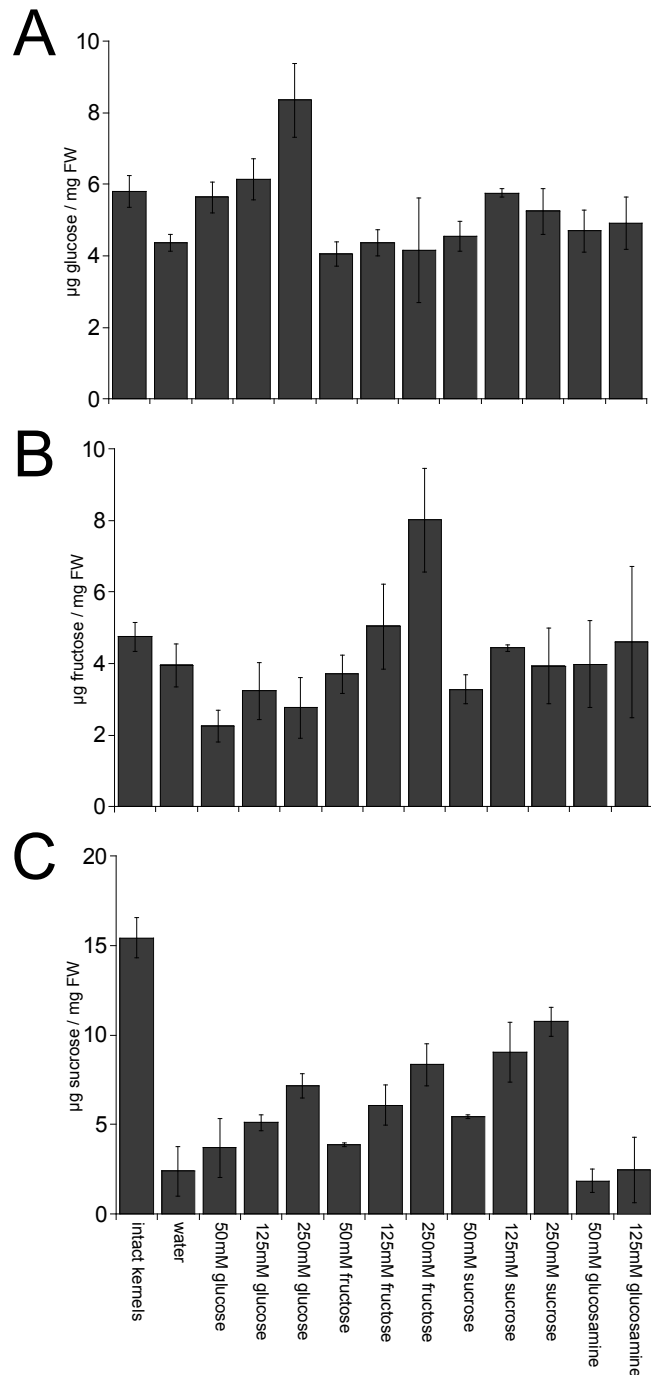

Supplemental Figure 3. Sugar content of *Mn1* cultured kernels. To determine how kernel culture in the presence of various sugars affects the content of sugars in developing kernels, duplicate samples to those analyzed in Figure 5E were assayed for sugar content. Panel (A) shows glucose content in µg glucose per mg fresh weight, Panel (B) shows fructose content in µg fructose per mg fresh weight, and panel (C) shows sucrose content in µg sucrose per mg fresh weight.
